# Supplementary material for: Misassembly of full-length Disrupted-in-Schizophrenia 1 protein is linked to altered dopamine homeostasis and behavioral deficits
Source: PubMed Central journal article supplement — Mol Psychiatry. 2016 Jan 12;21(11):1561–72. doi: 10.1038/mp.2015.194 (PMC5078859; doi:10.1038/mp.2015.194), 2016-01-12

# Figure S1

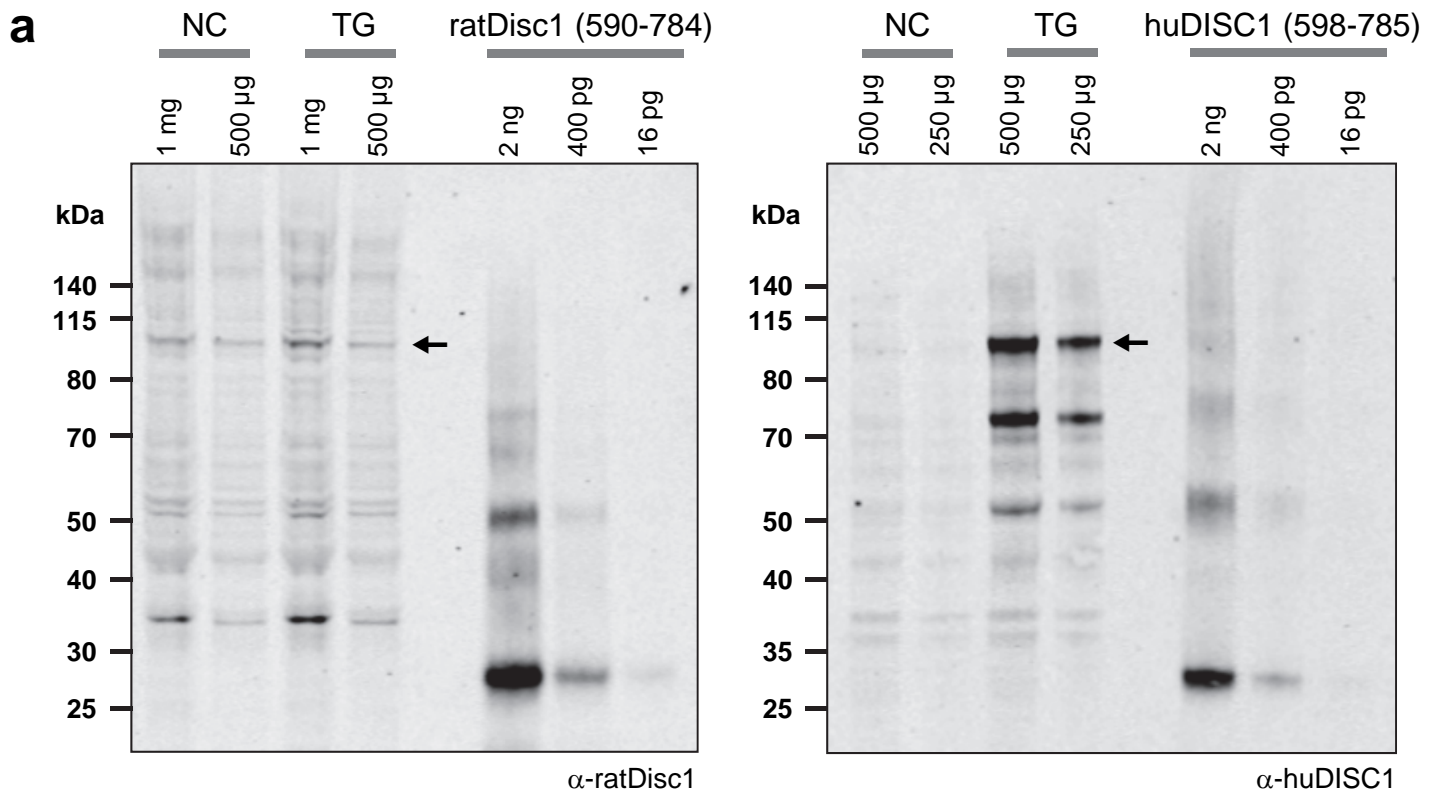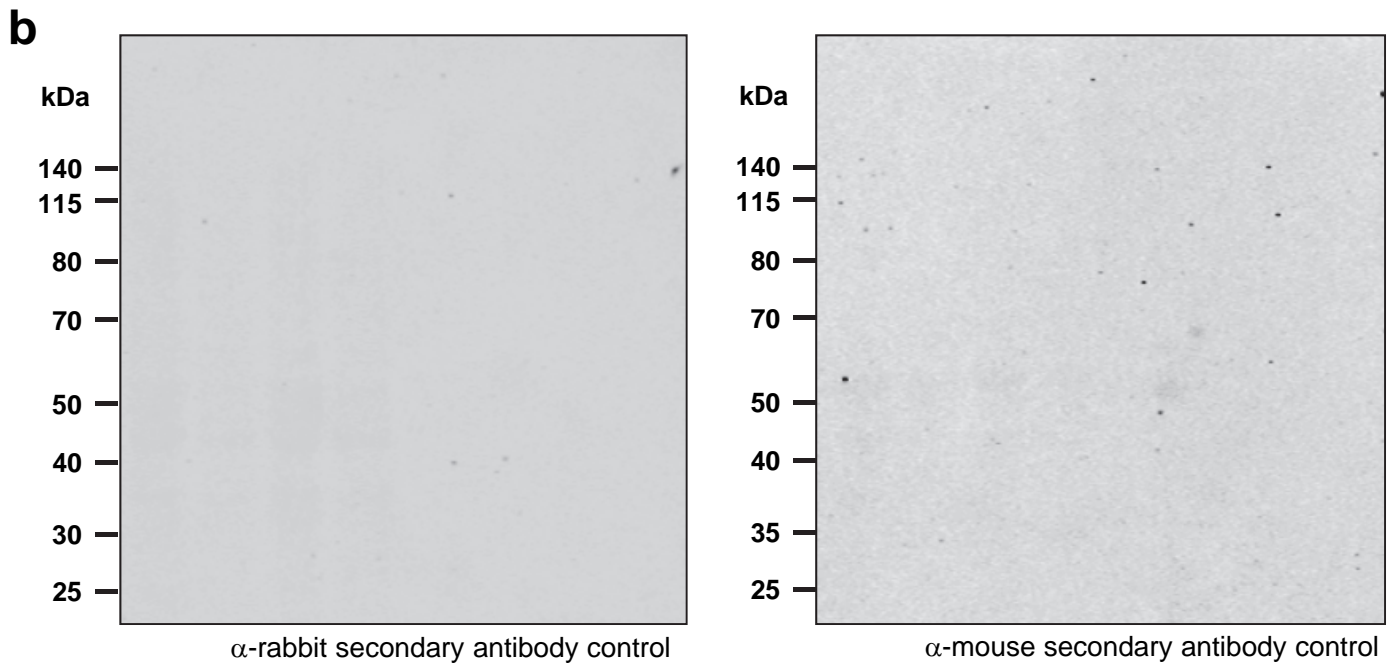

**c** endogenous and transgenic DISC1 in 500 µg of P58 brain tissue

**neg. control**

endogenous Disc1 ~ 44 pg

**tgDISC1 rat**

transgenic DISC1 ~ 490 pg

endogenous Disc1 ~ 43 pg

factor overexpression  
(ratio TG/NC)

**11**

**Figure S2**

**a**

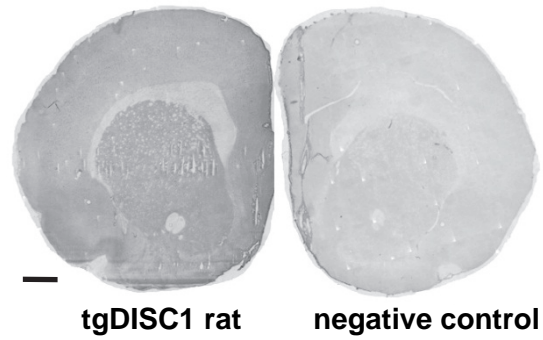

**b**

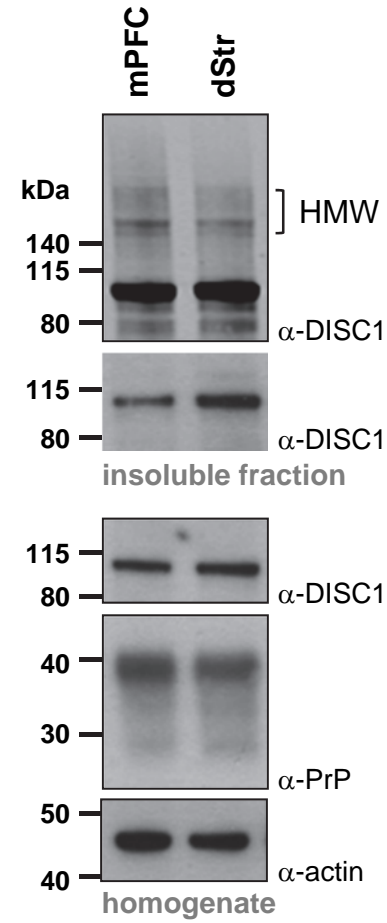

**c**

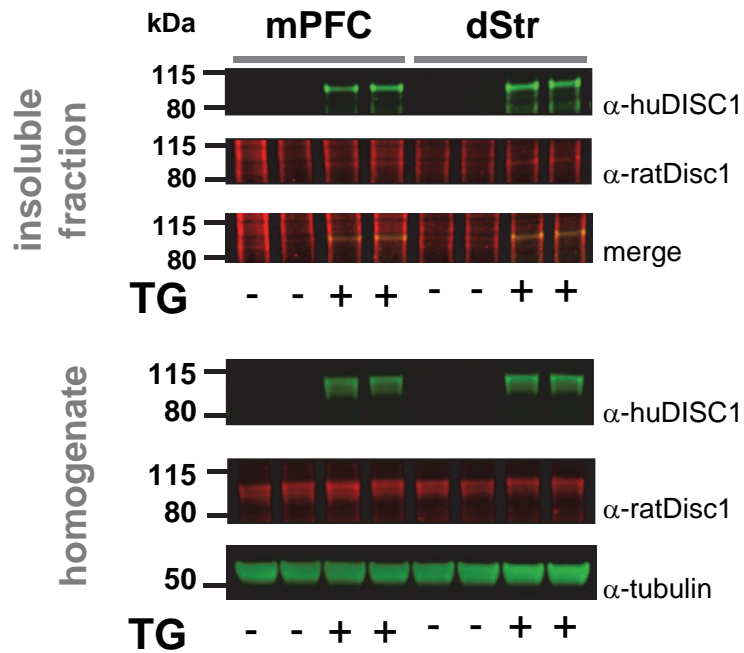

**d**

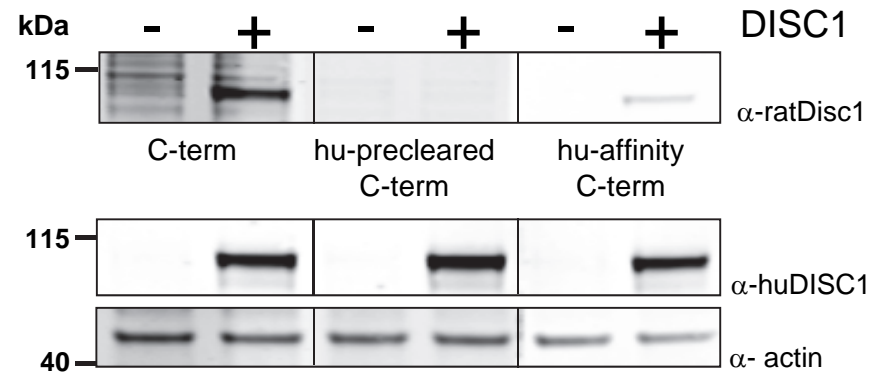

**Figure S3**

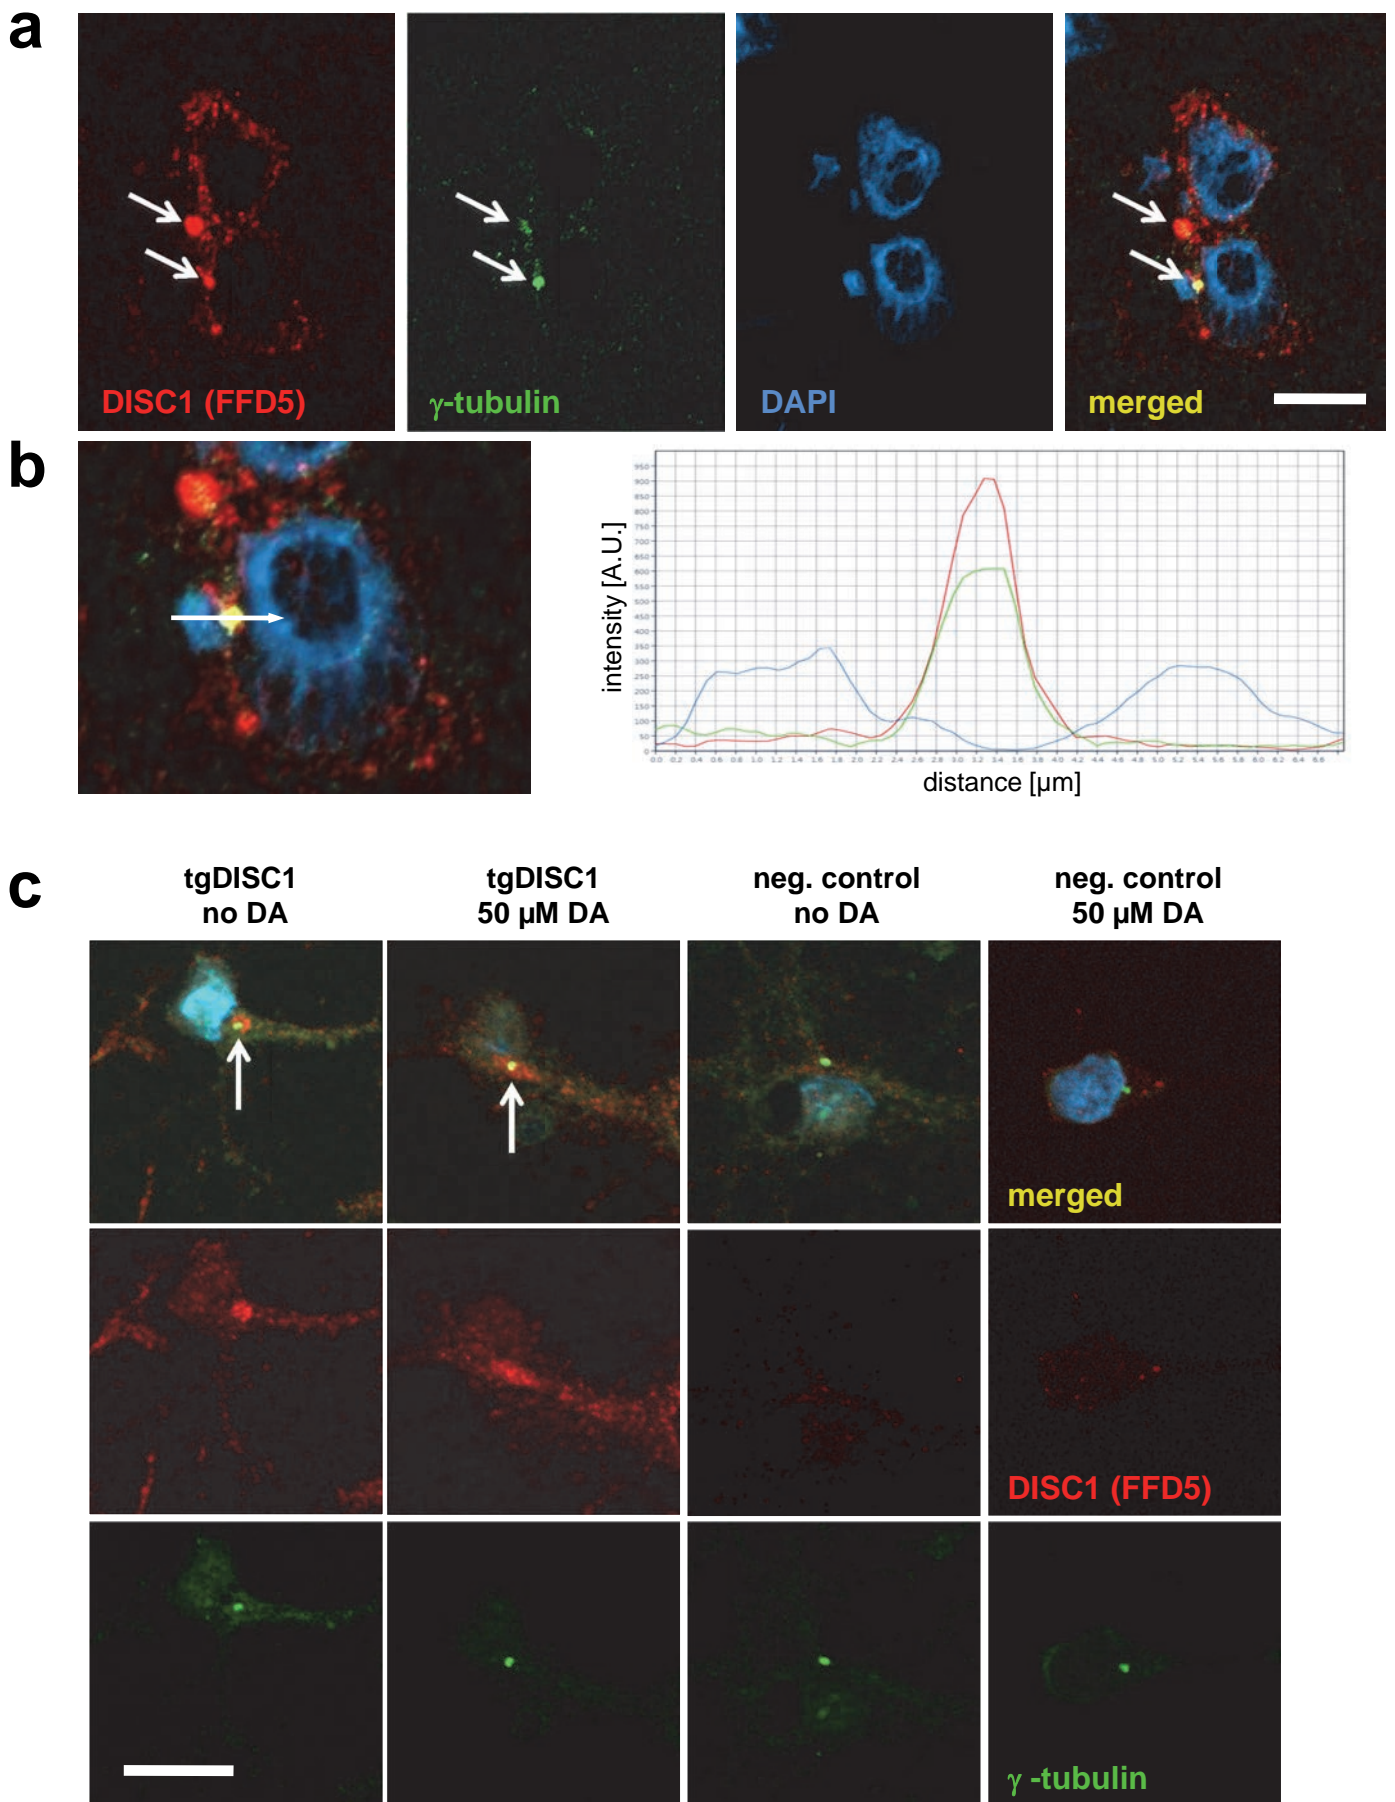



**Figure S4**

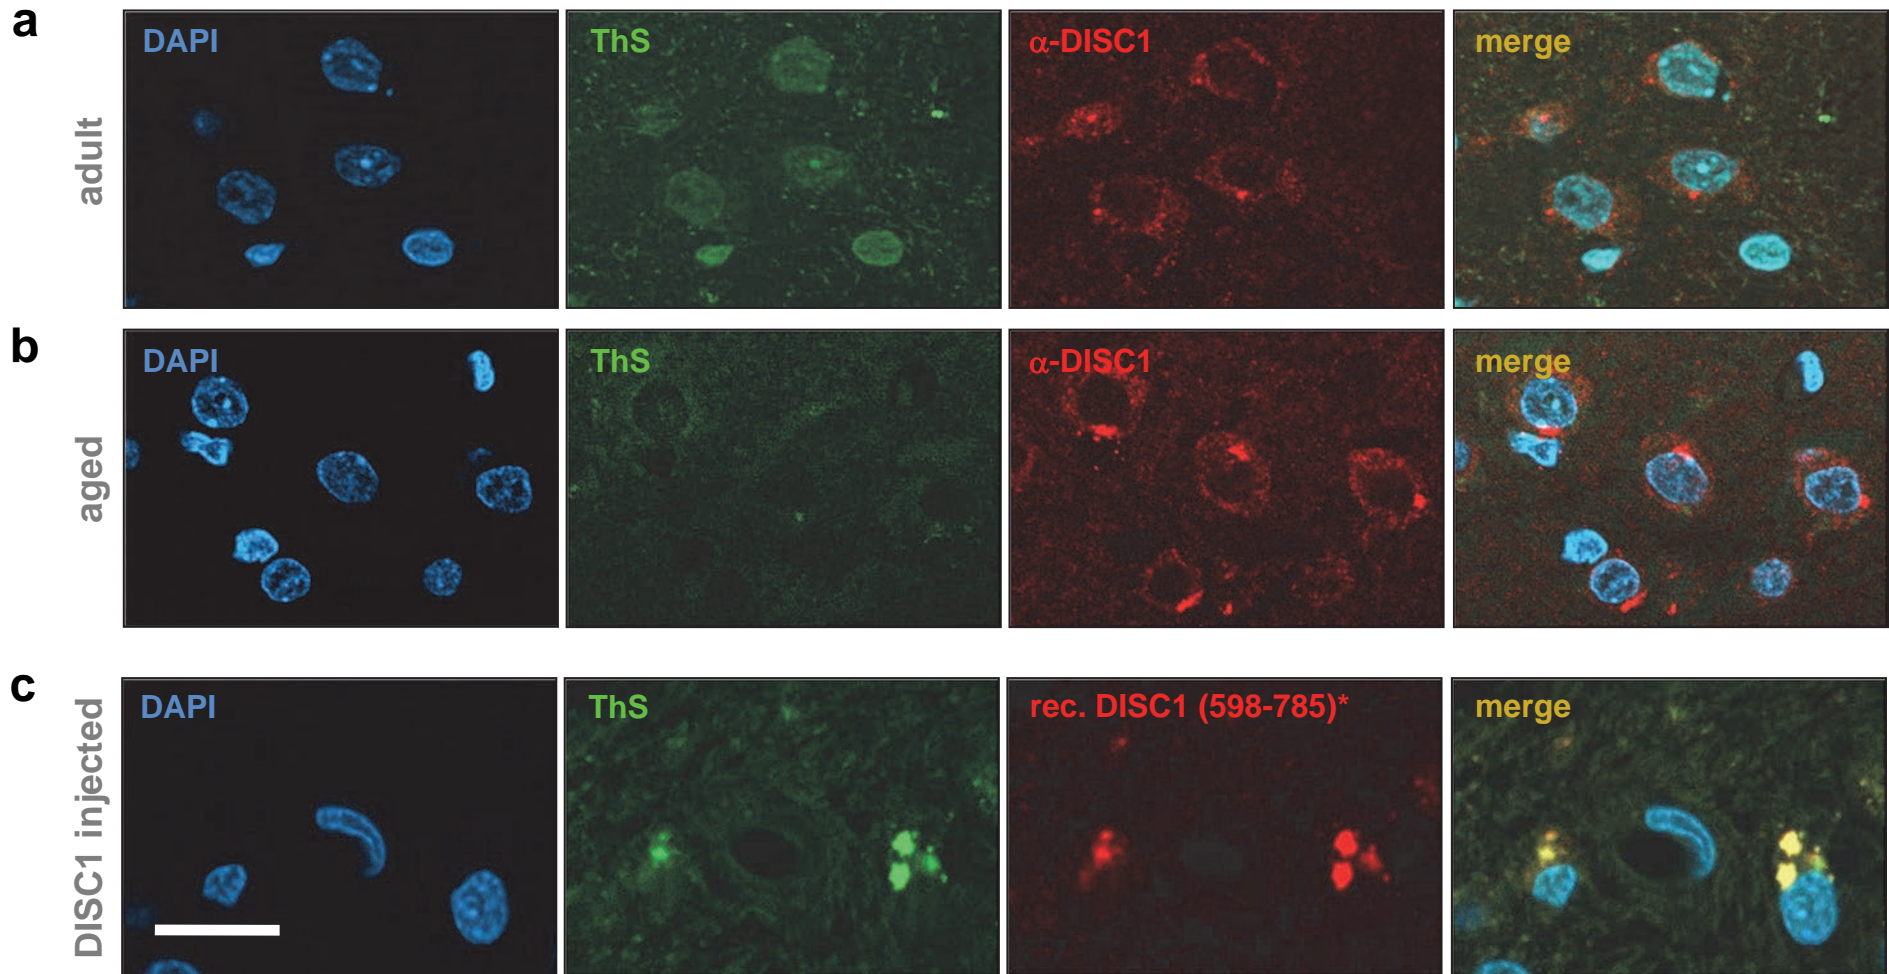

**Figure S5**

**a**

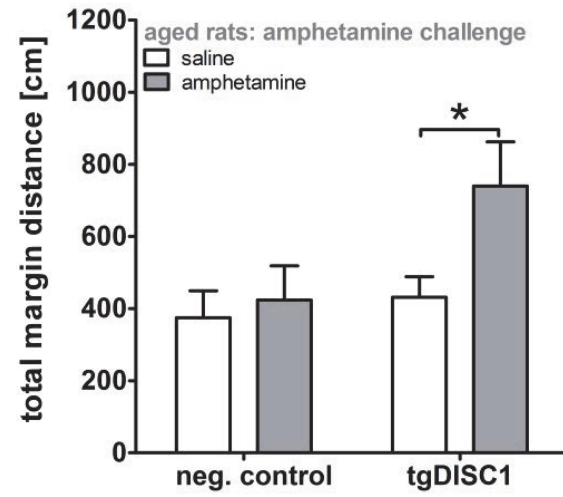

**b**

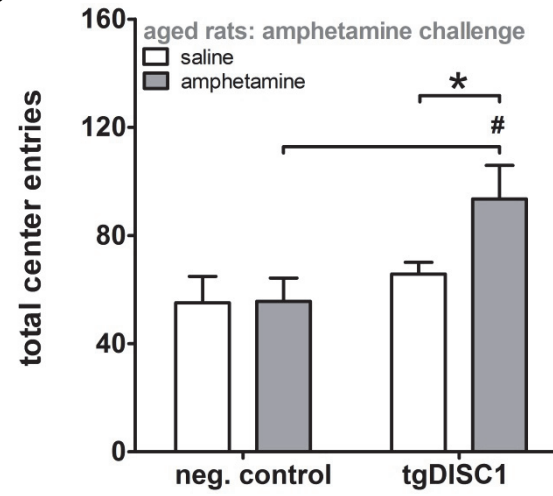

**c**

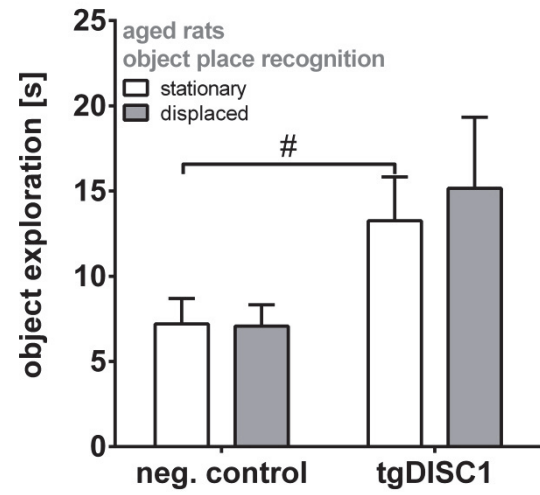

**d**

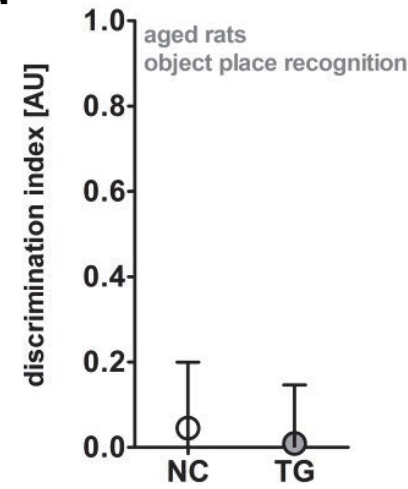

**Figure S6**

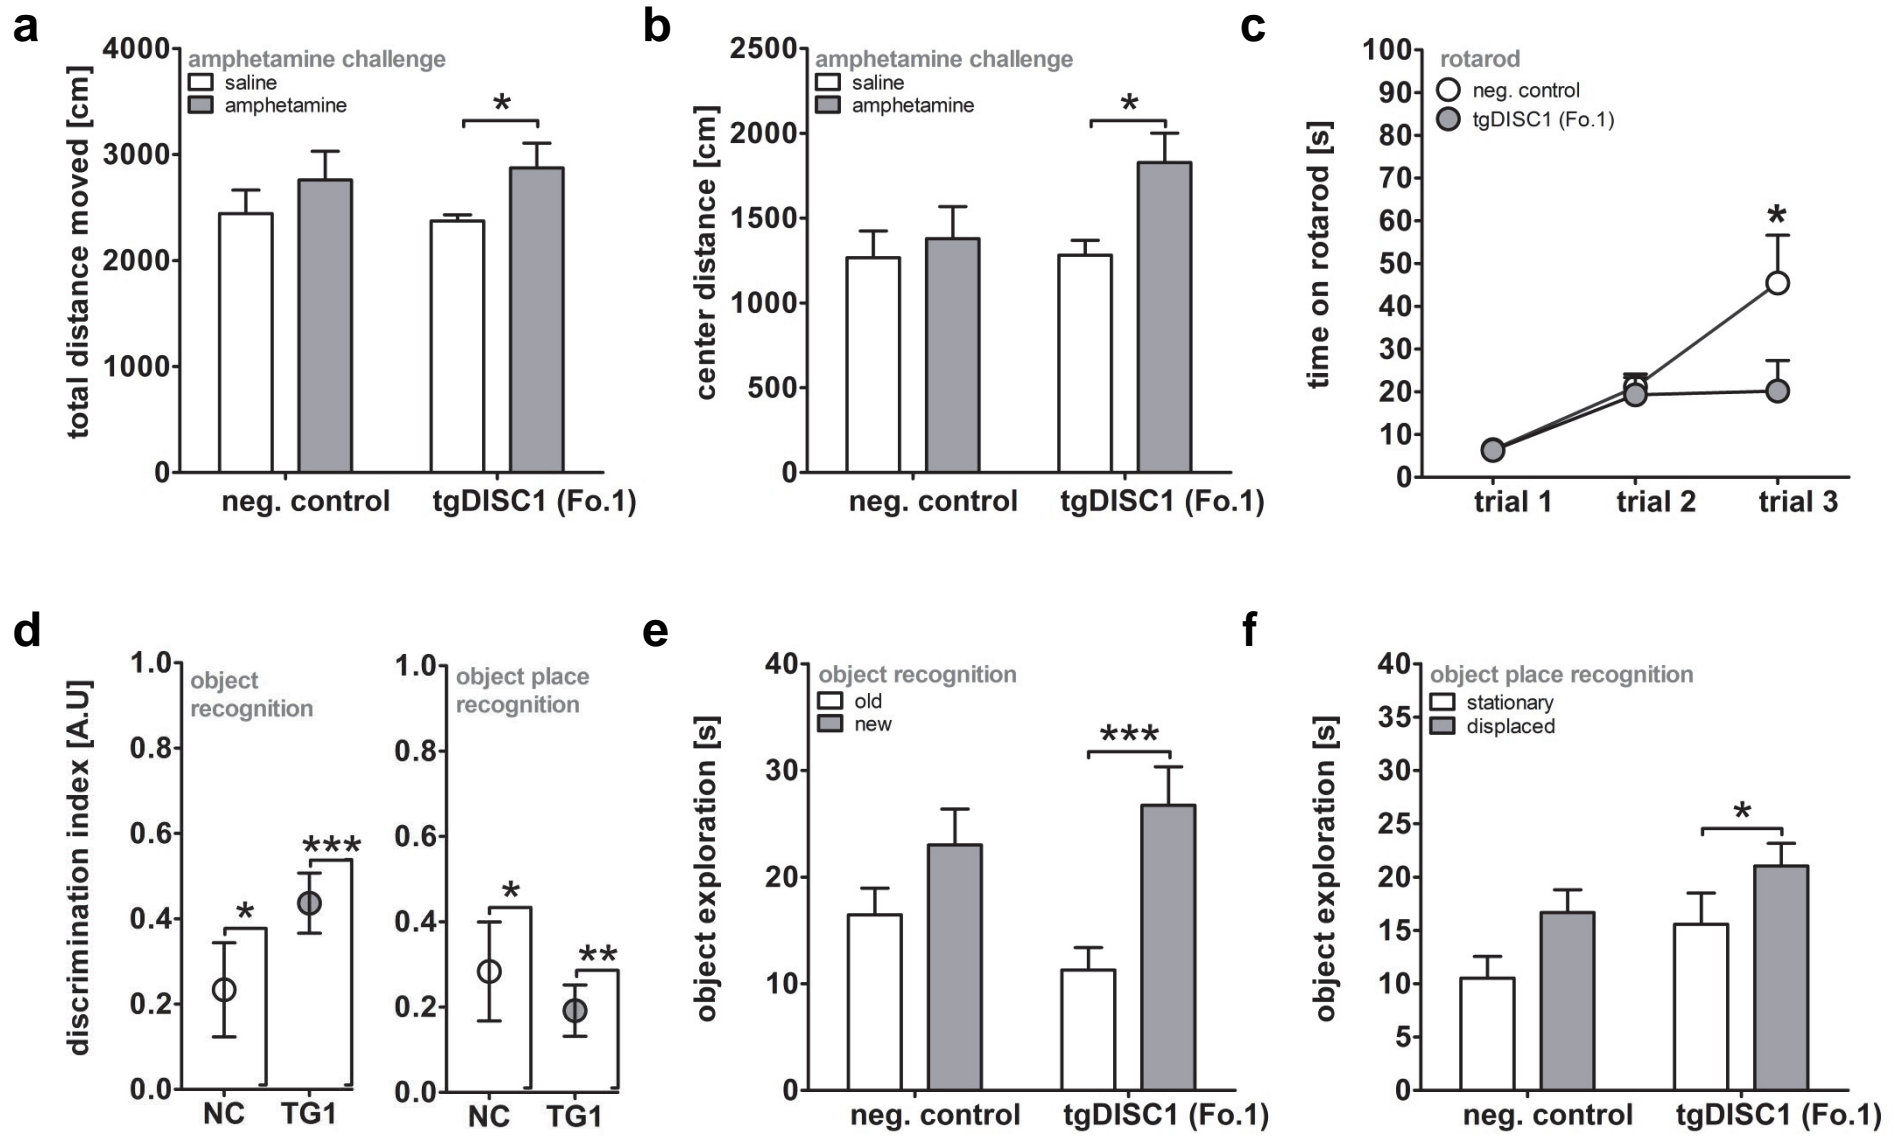

# Figure S7

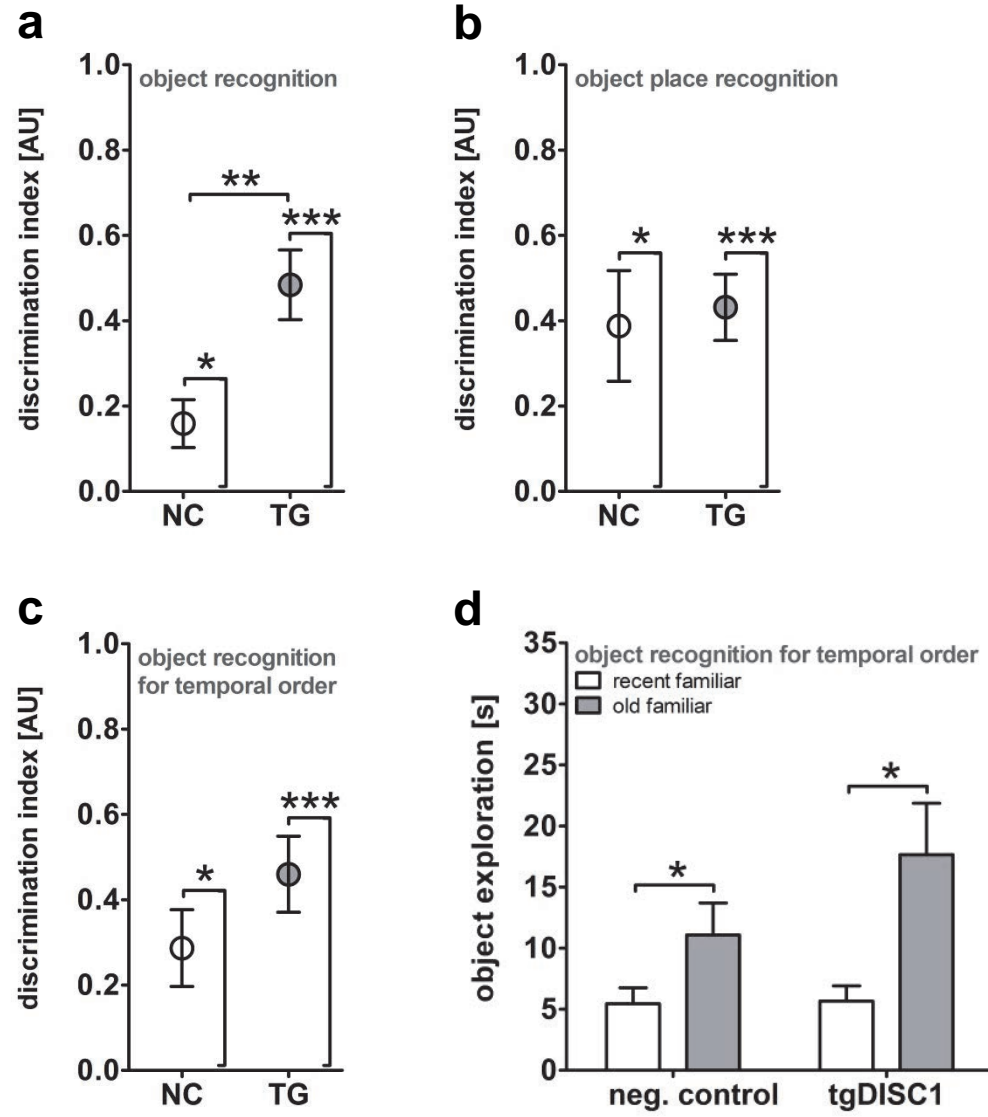

**Figure S8**

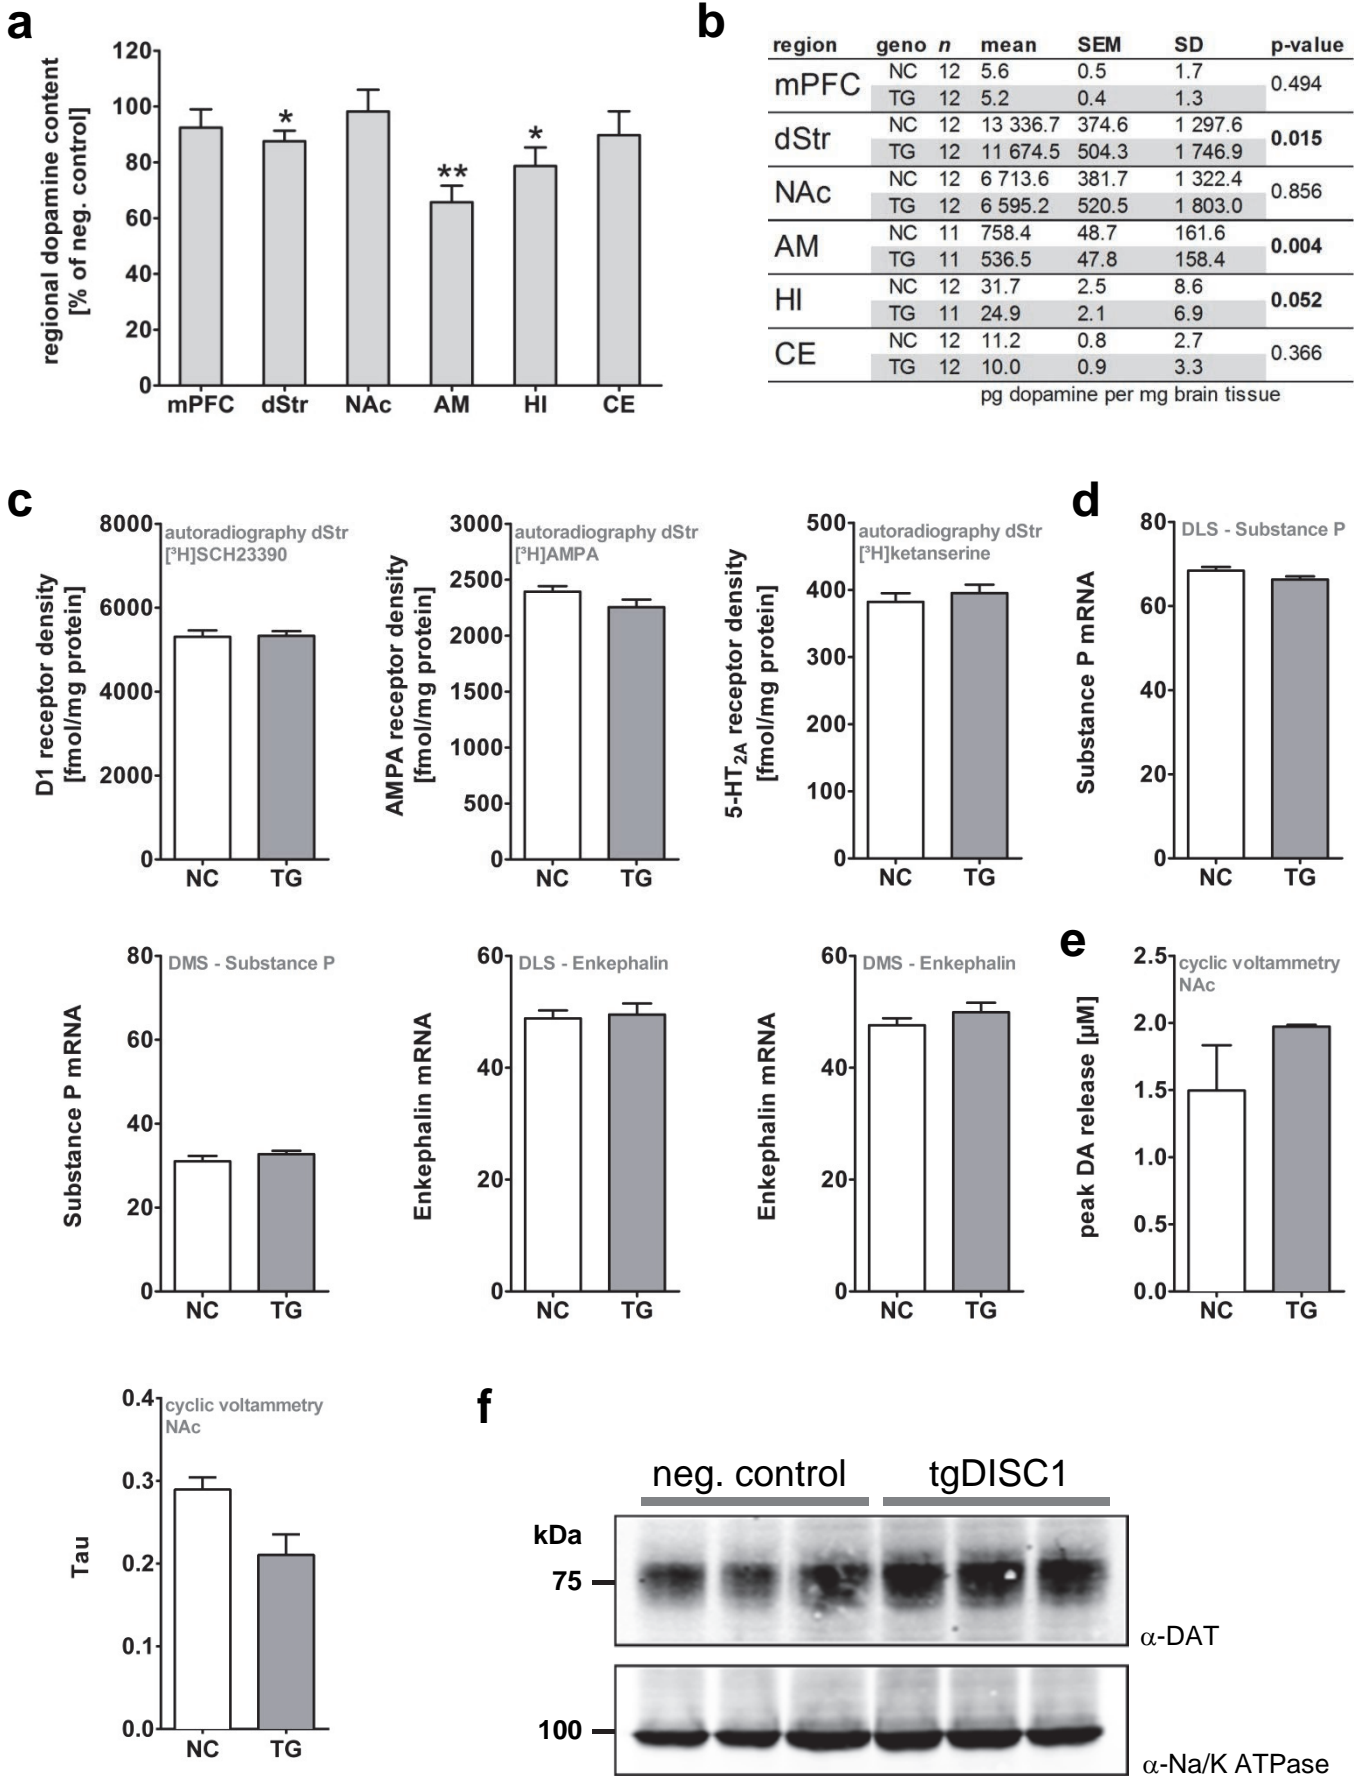



# Figure S9

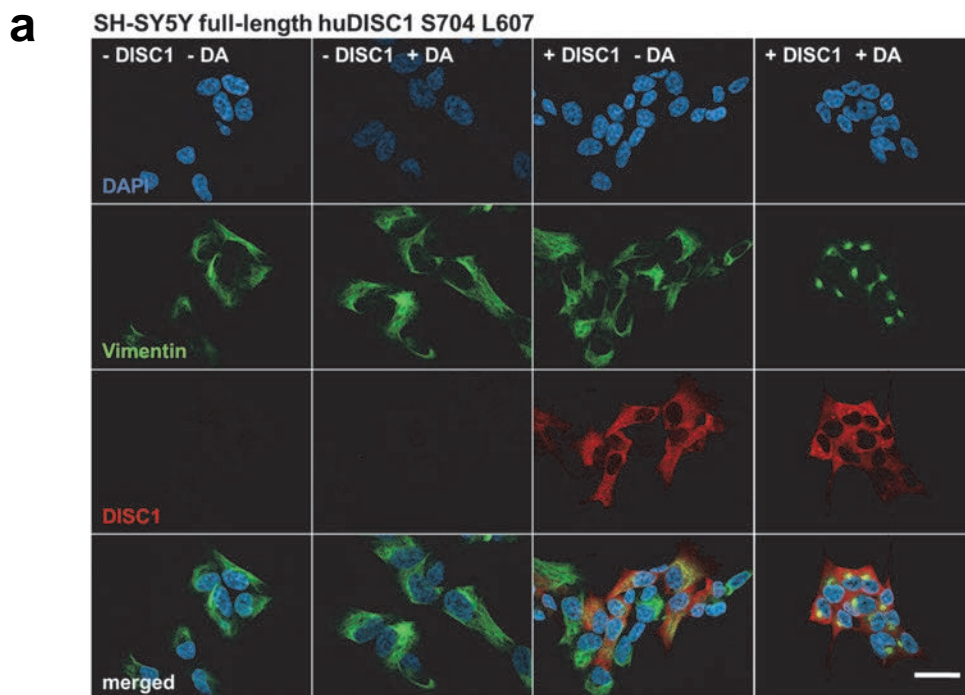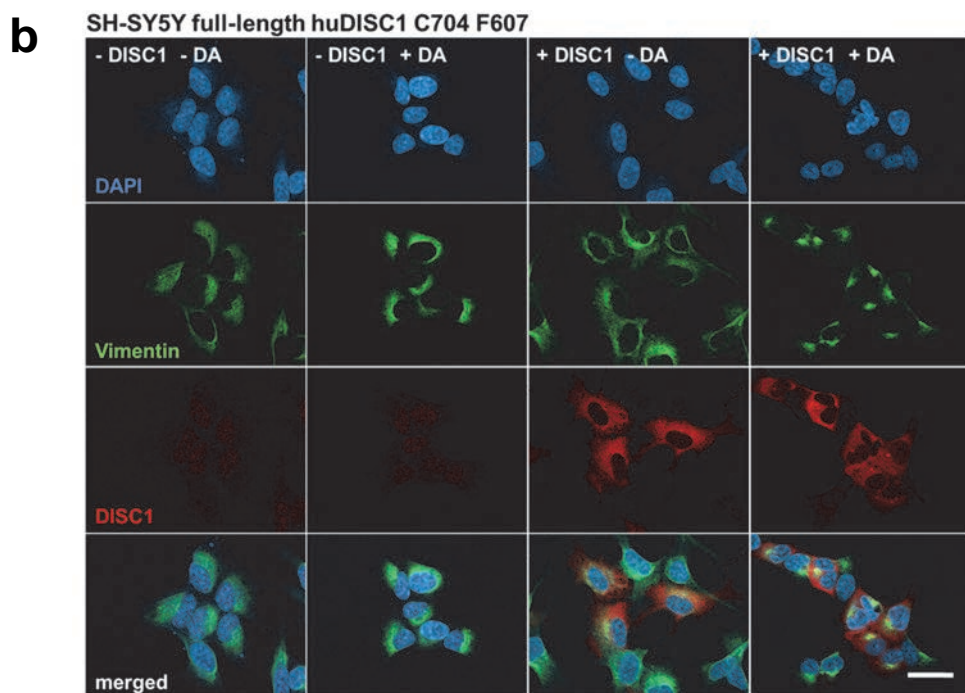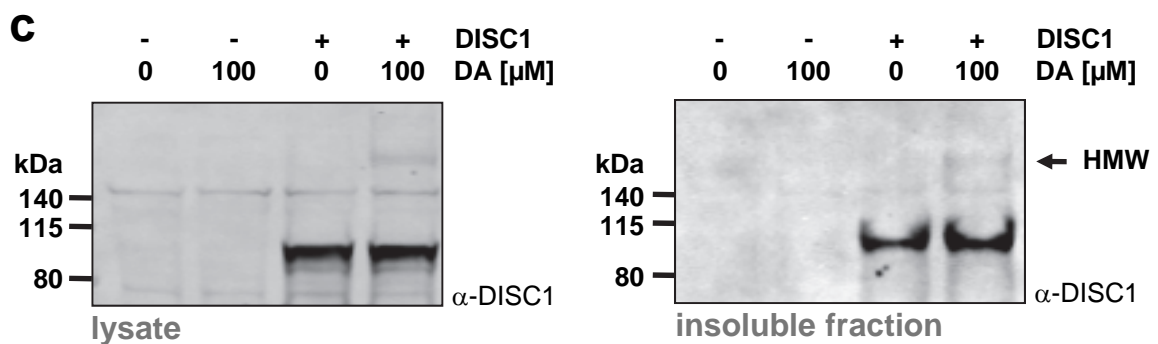

**Figure S10**

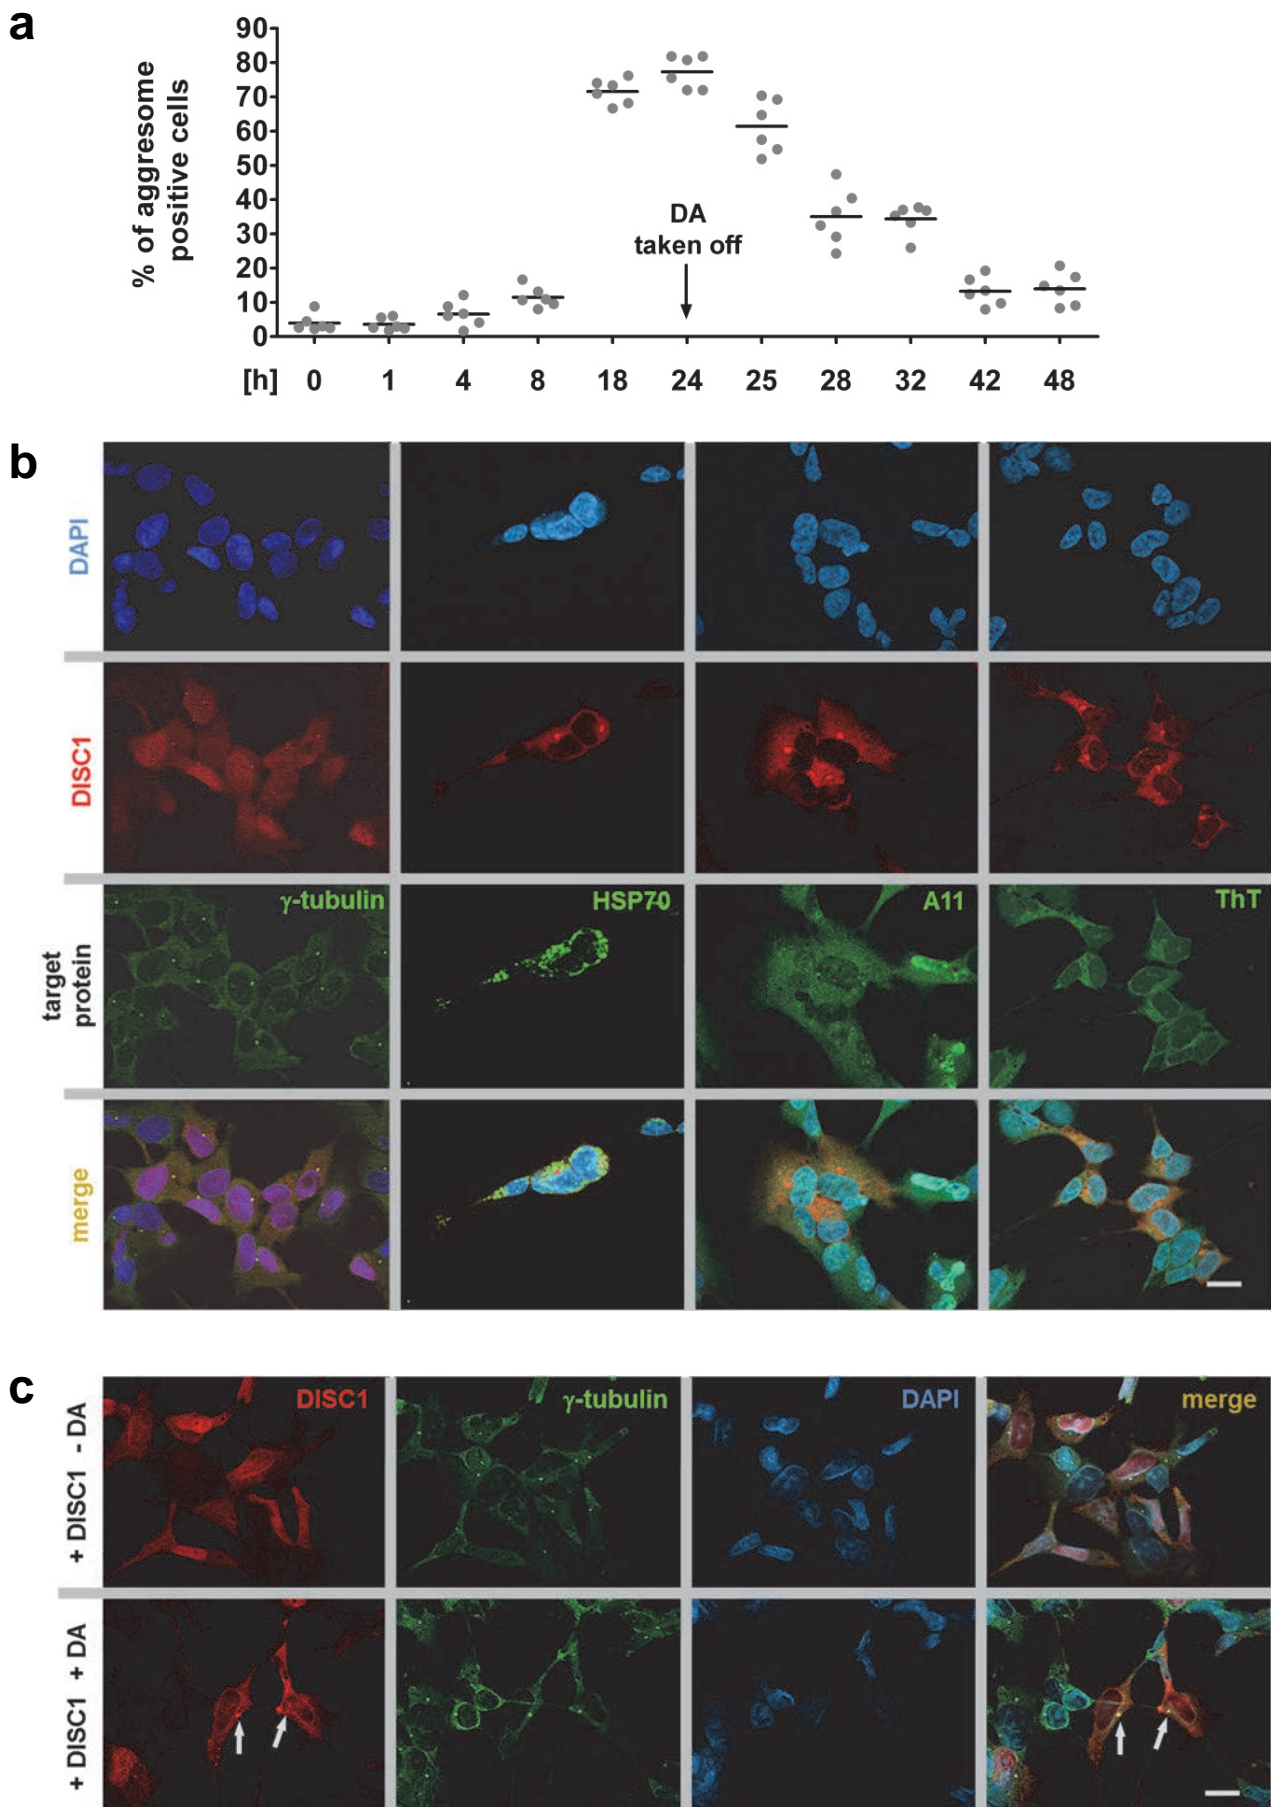

**Figure S11**

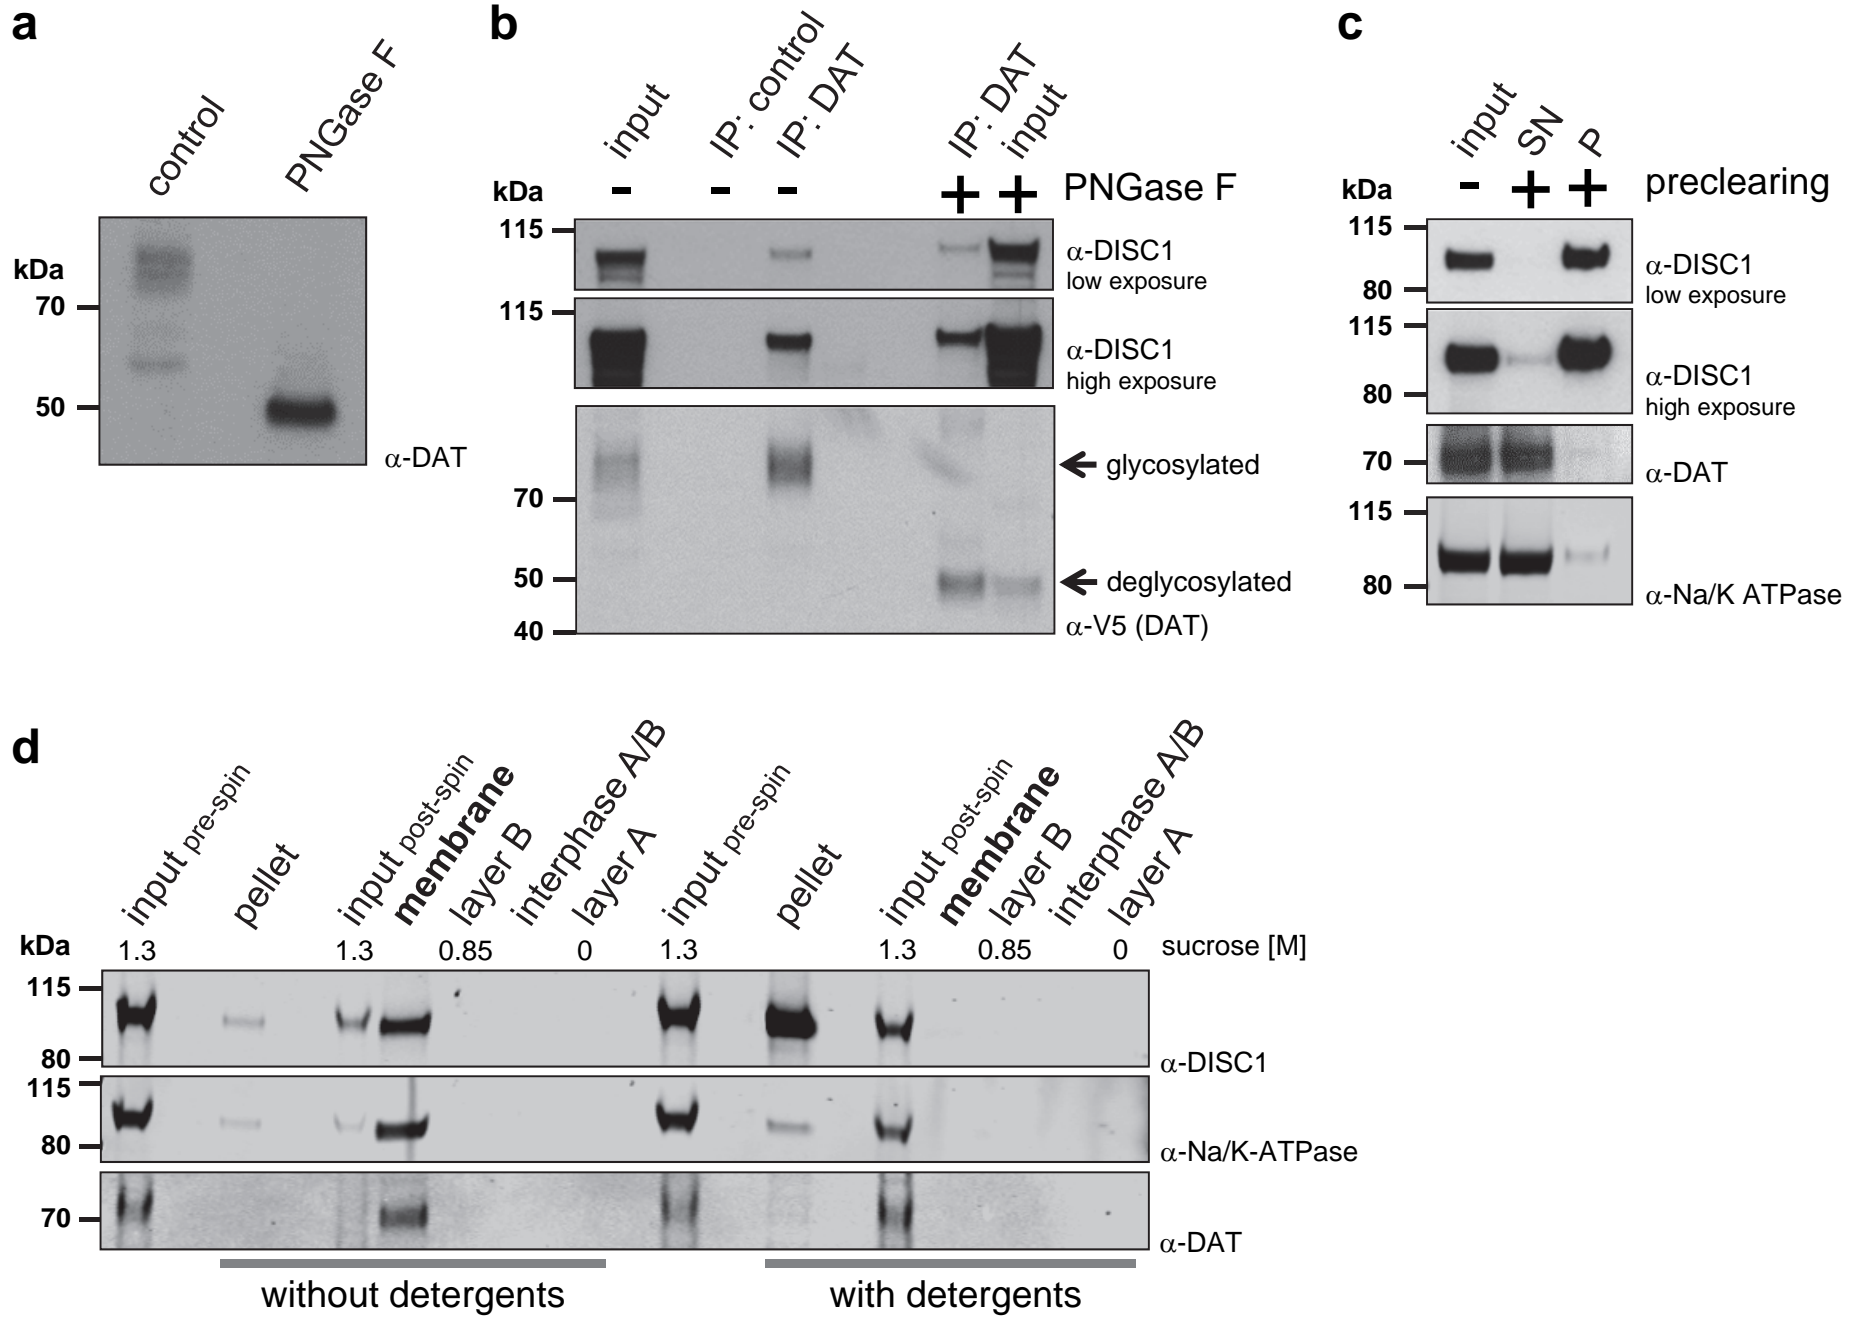

**Figure S12**

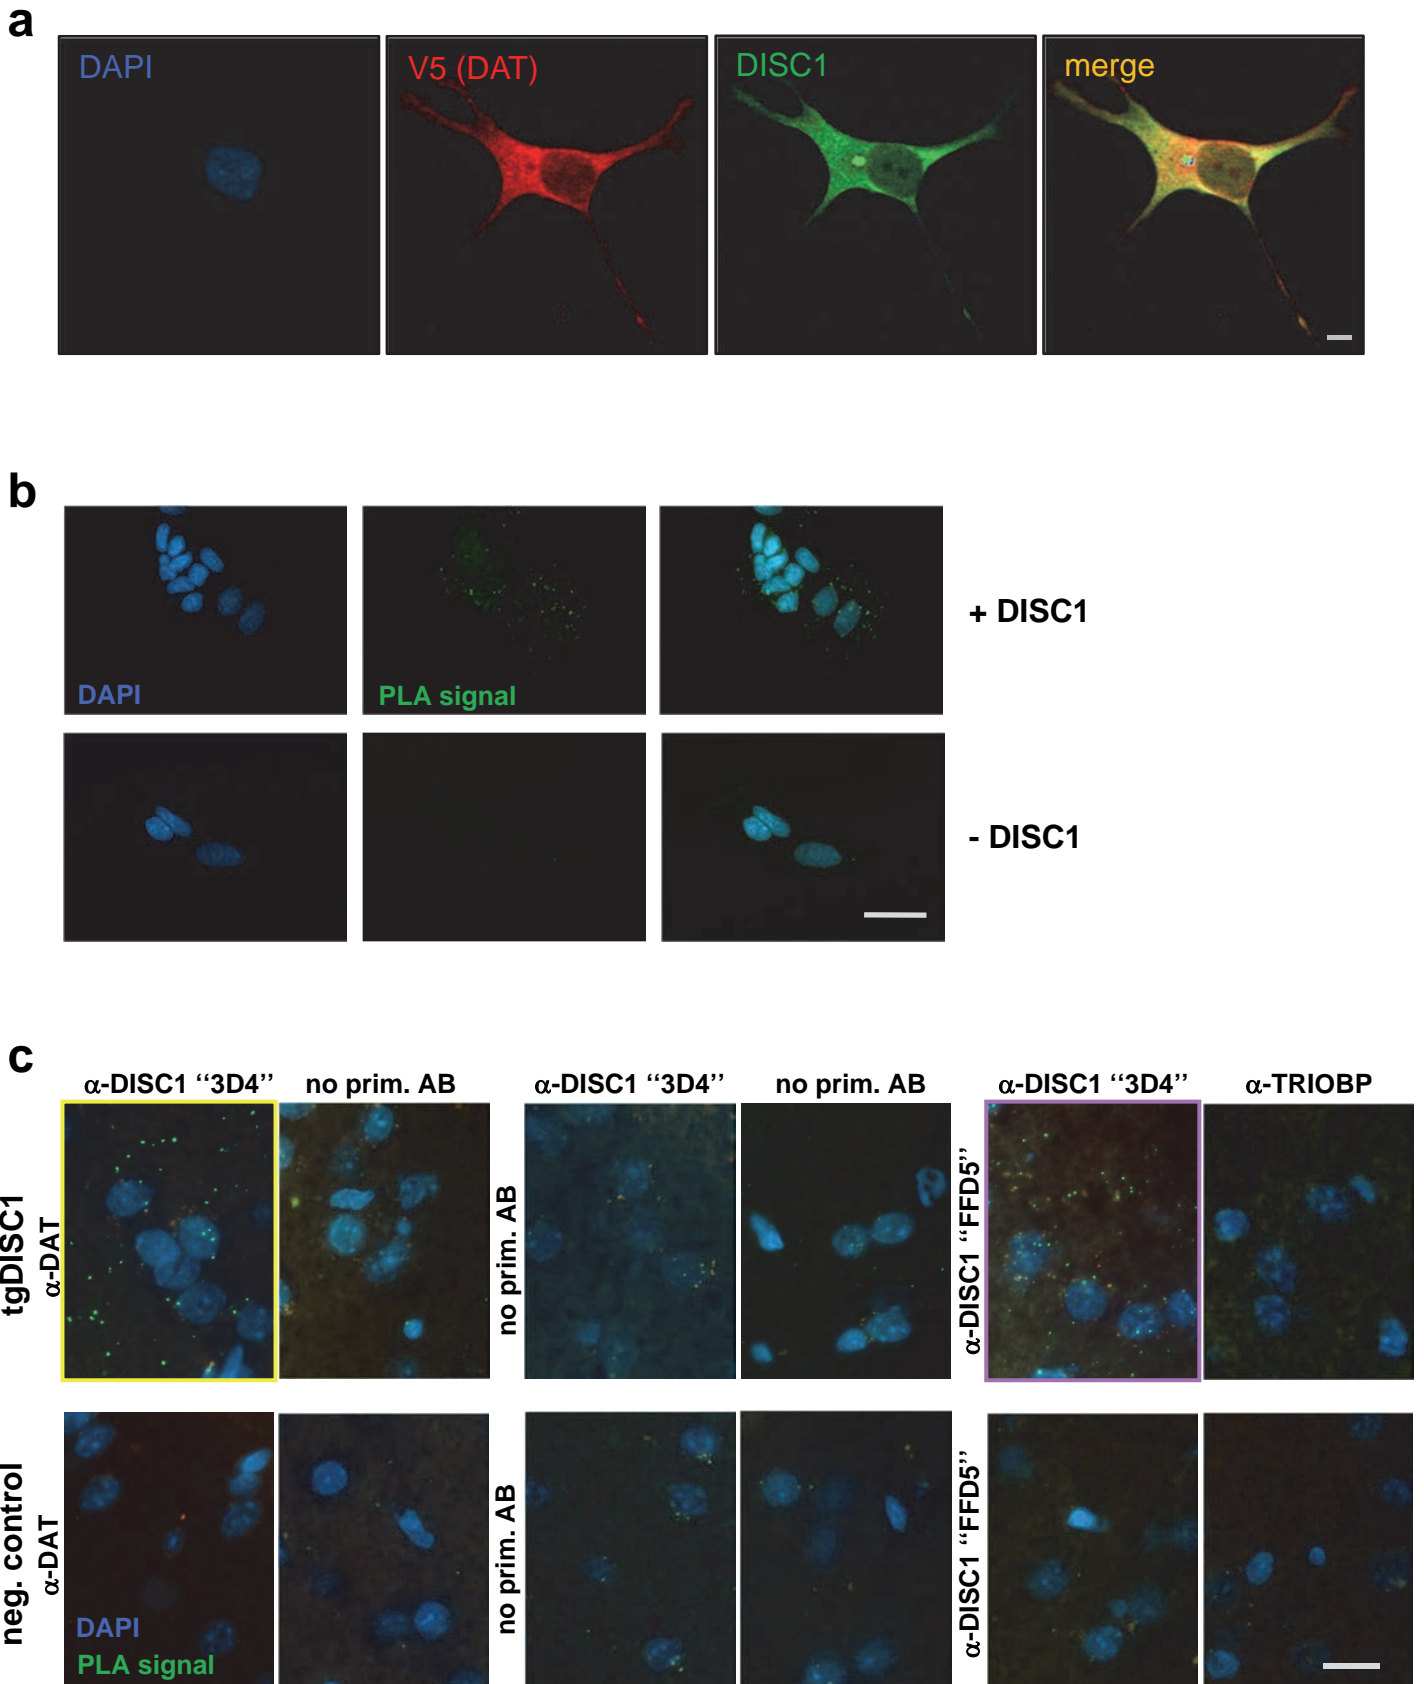

**Figure S13**

**a**

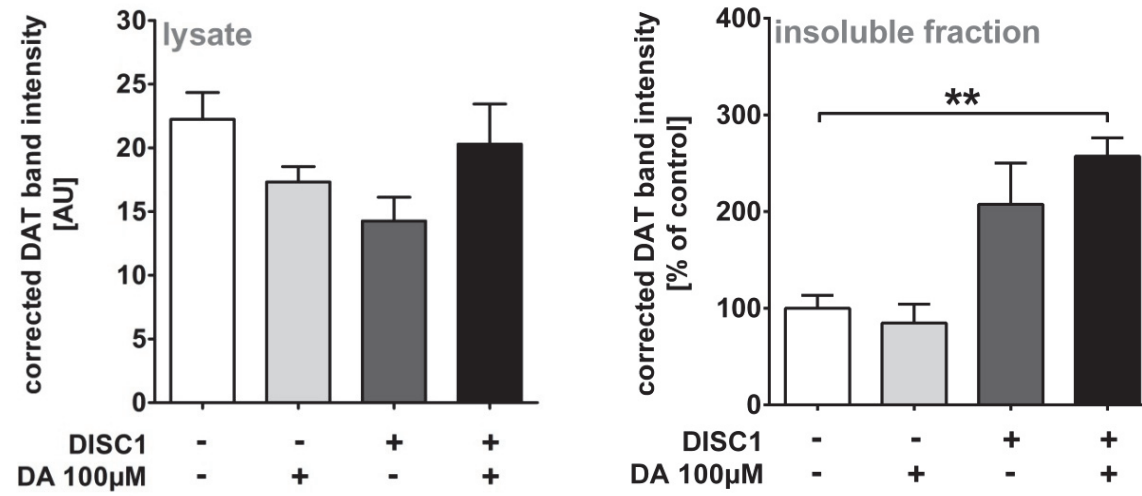

**b**

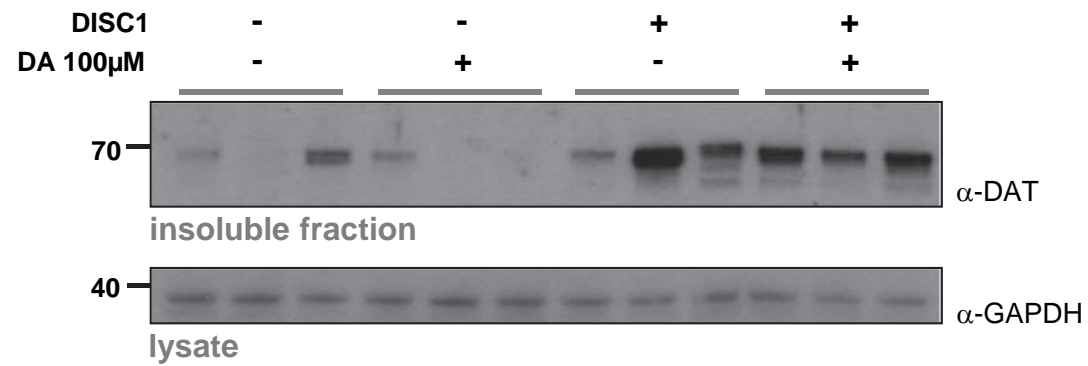



# Figure S14

**a**

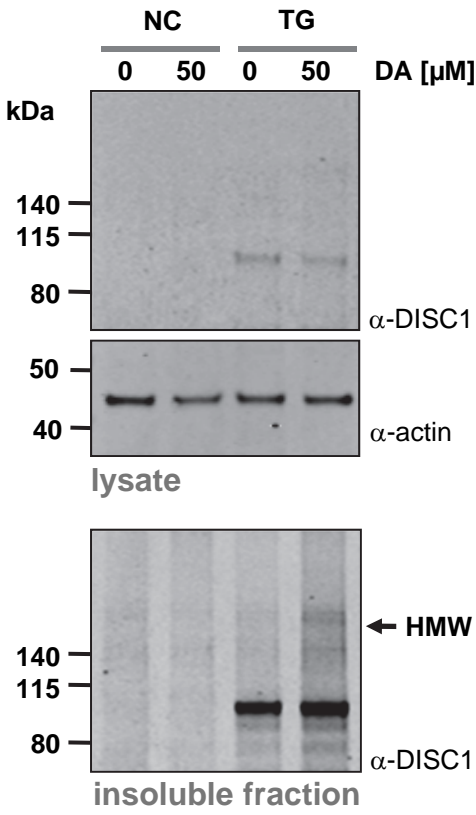

**b**

| Sequence                       | Start position | End position | Length | Mass    | Missed cleavages | Charges | PEP        | Score  |
|--------------------------------|----------------|--------------|--------|---------|------------------|---------|------------|--------|
| AASLDGPHEDPR                   | 249            | 260          | 12     | 1263,58 | 0                | 2,3     | 0,00049799 | 116,03 |
| AGSRDCLPPAACFR                 | 22             | 35           | 14     | 1576,72 | 1                | 3       | 0,032788   | 50,897 |
| ALQDTLASAGQIPFHAEPETIR         | 522            | 544          | 23     | 2461,26 | 0                | 3       | 2,58E-07   | 130,73 |
| DCLFPAACFR                     | 26             | 35           | 10     | 1205,53 | 0                | 2       | 0,0010389  | 119,68 |
| DVLLQEQK                       | 456            | 462          | 7      | 930,48  | 0                | 2       | 0,0022329  | 153,04 |
| EAESHCSQSPQEMGAK               | 234            | 248          | 15     | 1687,69 | 0                | 2,3     | 0,0056277  | 82,578 |
| EESYLSAELGEK                   | 769            | 781          | 13     | 1466,71 | 0                | 2       | 1,84E-07   | 174,46 |
| EGLEGLLSK                      | 619            | 627          | 9      | 944,52  | 0                | 2       | 0,0029906  | 106,88 |
| EIEALQAR                       | 468            | 475          | 8      | 928,50  | 0                | 2       | 0,012076   | 95,143 |
| EIEFEQQLQWGGCDLPLVGLSLGQLQEVSK | 489            | 521          | 33     | 3809,88 | 0                | 3,4     | 1,23E-07   | 125,34 |
| ETLQAMILQLQPAK                 | 820            | 833          | 14     | 1582,88 | 0                | 2       | 0,010025   | 75,927 |
| EVEHQETAYETSVK                 | 652            | 665          | 14     | 1648,76 | 0                | 2,3     | 2,04E-22   | 266,07 |
| FPGVSGEESHSESR                 | 67             | 82           | 16     | 1697,74 | 0                | 2,3     | 2,00E-07   | 153,41 |
| GATQQAQSGDDTHTPLR              | 419            | 434          | 16     | 1653,77 | 0                | 2,3     | 1,11E-11   | 193,54 |
| GATQQAQSGDDTHTPLRMEPR          | 419            | 438          | 20     | 2167,01 | 1                | 3       | 0,0033567  | 74,732 |
| GSLSVEDER                      | 712            | 720          | 9      | 990,46  | 0                | 2       | 0,0008629  | 132,88 |
| GSLSVEDERQMDLEGAAPPPIPR        | 712            | 735          | 24     | 2578,23 | 1                | 3       | 0,00031866 | 102,15 |
| GTSAHFGILR                     | 113            | 123          | 11     | 1185,63 | 0                | 2,3     | 6,64E-12   | 215,06 |
| ISLHFQLPSR                     | 388            | 397          | 10     | 1196,67 | 0                | 2,3     | 0,001042   | 106,62 |
| KKVNDIETQLPALLEAK              | 576            | 592          | 17     | 1909,09 | 2                | 3       | 4,25E-05   | 128,82 |
| KLGSVKEDYNR                    | 638            | 648          | 11     | 1307,68 | 2                | 2,3     | 0,00068595 | 121,29 |
| KVNDIETQLPALLEAK               | 577            | 592          | 16     | 1780,99 | 1                | 3       | 7,51E-07   | 153,41 |
| LEDLEQEK                       | 380            | 387          | 8      | 1002,49 | 0                | 2       | 1,58E-05   | 179,37 |
| LEDLEQEKISLHFQLPSR             | 380            | 397          | 18     | 2181,14 | 1                | 3       | 3,52E-05   | 116,61 |
| LGSVKEDYNR                     | 639            | 648          | 10     | 1179,59 | 1                | 3       | 0,003567   | 50,034 |
| LLEPTAQDLSHVSITR               | 439            | 454          | 16     | 1778,95 | 0                | 3       | 0,0036885  | 82,483 |
| LLEPTAQDLSHVSITRR              | 439            | 455          | 17     | 1935,05 | 1                | 4       | 0,03462    | 37,77  |
| LLIQLQLQEAR                    | 700            | 711          | 12     | 1410,82 | 0                | 2,3     | 2,48E-13   | 246,63 |
| LLVLSR                         | 628            | 634          | 7      | 786,50  | 0                | 2       | 0,010114   | 104,21 |
| LQEDAVENDDYK                   | 360            | 372          | 13     | 1552,65 | 0                | 2       | 3,27E-07   | 170,74 |
| LQEDAVENDDYKAETLQQR            | 360            | 379          | 20     | 2379,08 | 1                | 2,3     | 5,97E-19   | 247,28 |
| LQEDAVENDDYKAETLQQRLEDEQEK     | 360            | 387          | 28     | 3363,56 | 2                | 4       | 0,047774   | 22,406 |
| LSLGSAGER                      | 215            | 223          | 9      | 888,47  | 0                | 2       | 0,00033398 | 148,8  |
| LSLGSAGEREAGCPPSR              | 215            | 233          | 19     | 1928,90 | 1                | 2,3     | 2,00E-05   | 115,53 |
| MFVLEAK                        | 476            | 482          | 7      | 836,45  | 0                | 2       | 0,0099322  | 101,64 |
| QMDDLEGAAPPPIPR                | 721            | 735          | 15     | 1605,78 | 0                | 2       | 0,00015349 | 144,8  |
| QMEVISLR                       | 347            | 354          | 8      | 974,52  | 0                | 2       | 0,039297   | 69,628 |
| QPALSSFLGHLAAQVQALR            | 398            | 417          | 20     | 2077,14 | 0                | 3       | 0,001626   | 82,121 |
| QPALSSFLGHLAAQVQALRR           | 398            | 418          | 21     | 2233,24 | 1                | 4       | 0,039019   | 27,333 |
| QQIQKEIQLQEAR                  | 463            | 475          | 13     | 1553,85 | 1                | 2,3     | 0,00019134 | 140,01 |
| REIFEQQLQWGGCDLPLVGLSLGQLQEVSK | 488            | 521          | 34     | 3965,98 | 1                | 3,4     | 0,000124   | 90,921 |
| RGATQQAQSGDDTHTPLR             | 418            | 434          | 17     | 1809,87 | 1                | 3       | 3,76E-07   | 154,31 |
| SAAAPTIVTSVR                   | 102            | 112          | 11     | 1058,57 | 0                | 2       | 1,29E-05   | 152,67 |
| SINLSLK                        | 552            | 558          | 7      | 773,46  | 0                | 2       | 0,0022914  | 148,99 |
| SINLSLKITTK                    | 552            | 563          | 12     | 1345,78 | 1                | 2,3     | 0,00050049 | 137,62 |
| SLTSEREGLEGLLSK                | 613            | 627          | 15     | 1617,86 | 1                | 2,3     | 1,43E-06   | 160,03 |
| SSTGRGIGFLFPAVGTFLR            | 48             | 66           | 19     | 1862,99 | 0                | 2,3     | 2,49E-06   | 142,58 |
| VNDIETQLPALLEAK                | 578            | 592          | 15     | 1652,90 | 0                | 2,3     | 1,65E-22   | 257,16 |
| VNSADLAQAR                     | 273            | 282          | 10     | 1000,93 | 0                | 2       | 9,73E-12   | 219,72 |
| VVWEADLEACR                    | 690            | 699          | 10     | 1247,56 | 0                | 2       | 2,49E-05   | 147,74 |
| VVWEADLEACRLIQLSLOLQEAR        | 690            | 711          | 22     | 2640,37 | 1                | 3       | 1,60E-08   | 152,86 |

**c**

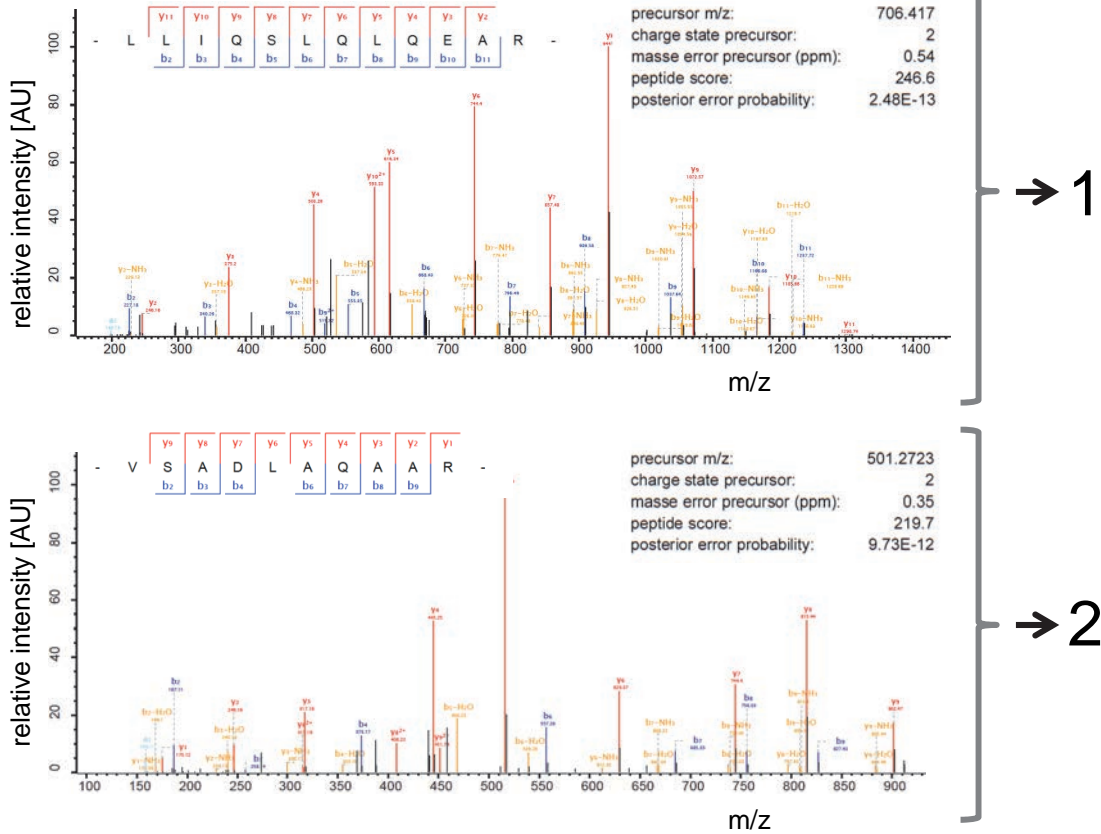

**Figure S15**

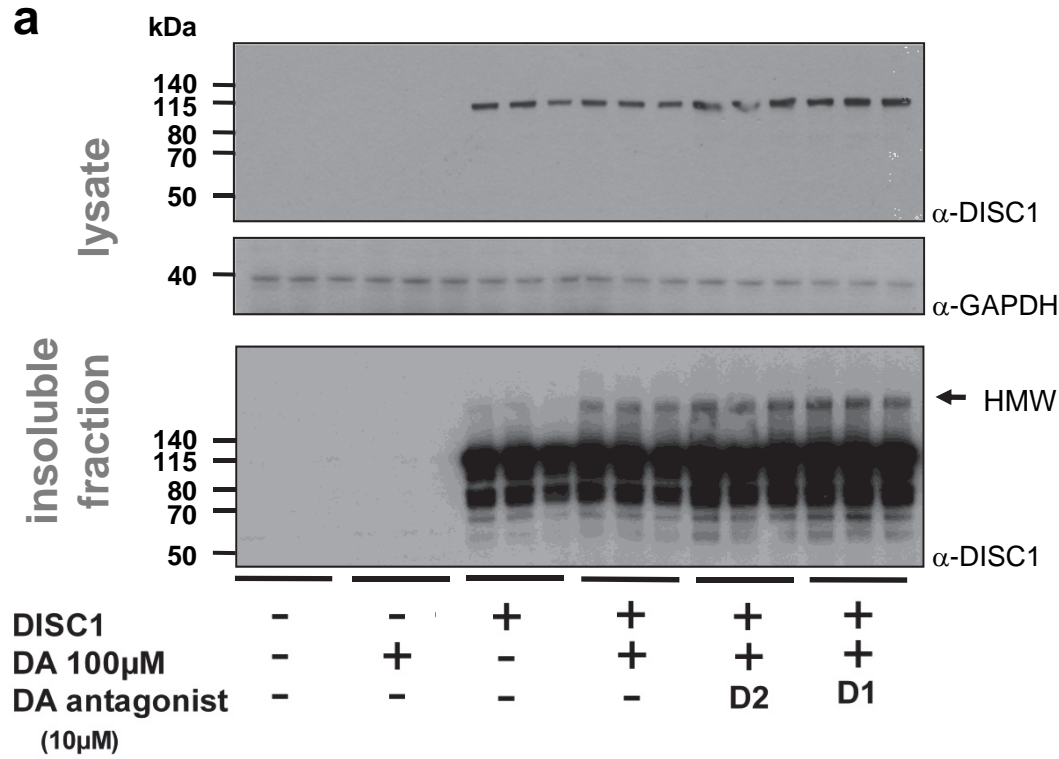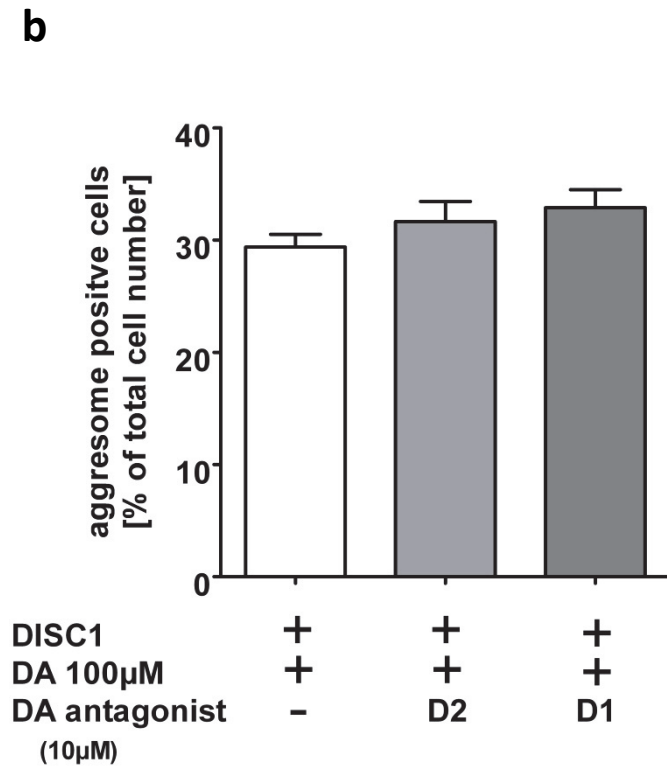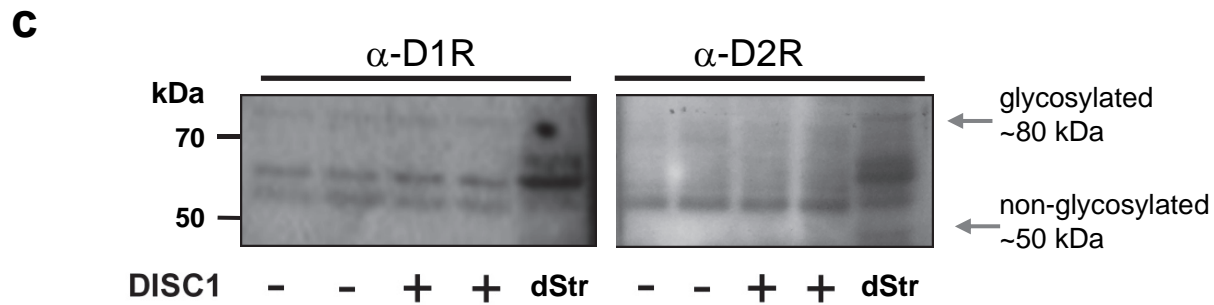

# Figure S16

**a**

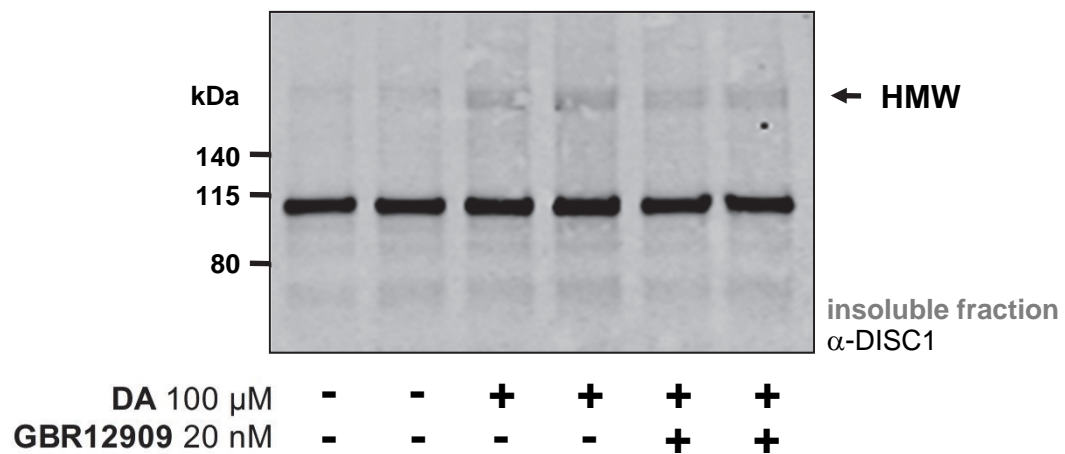

**b**

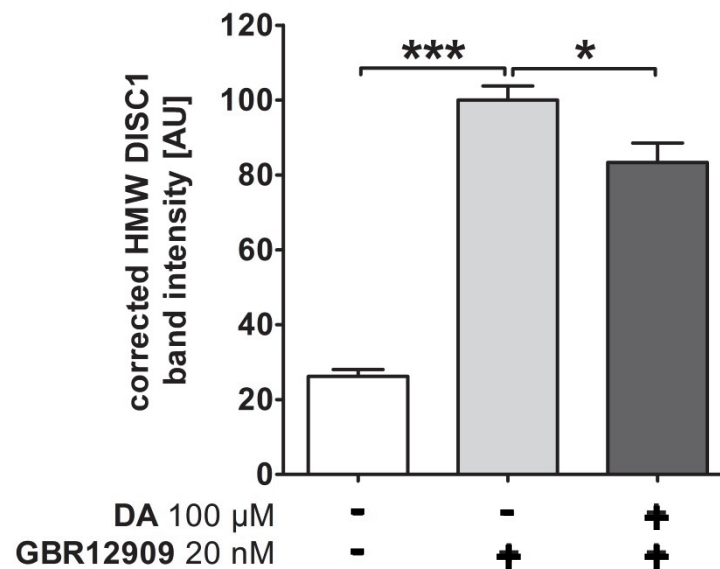

**Figure S17**

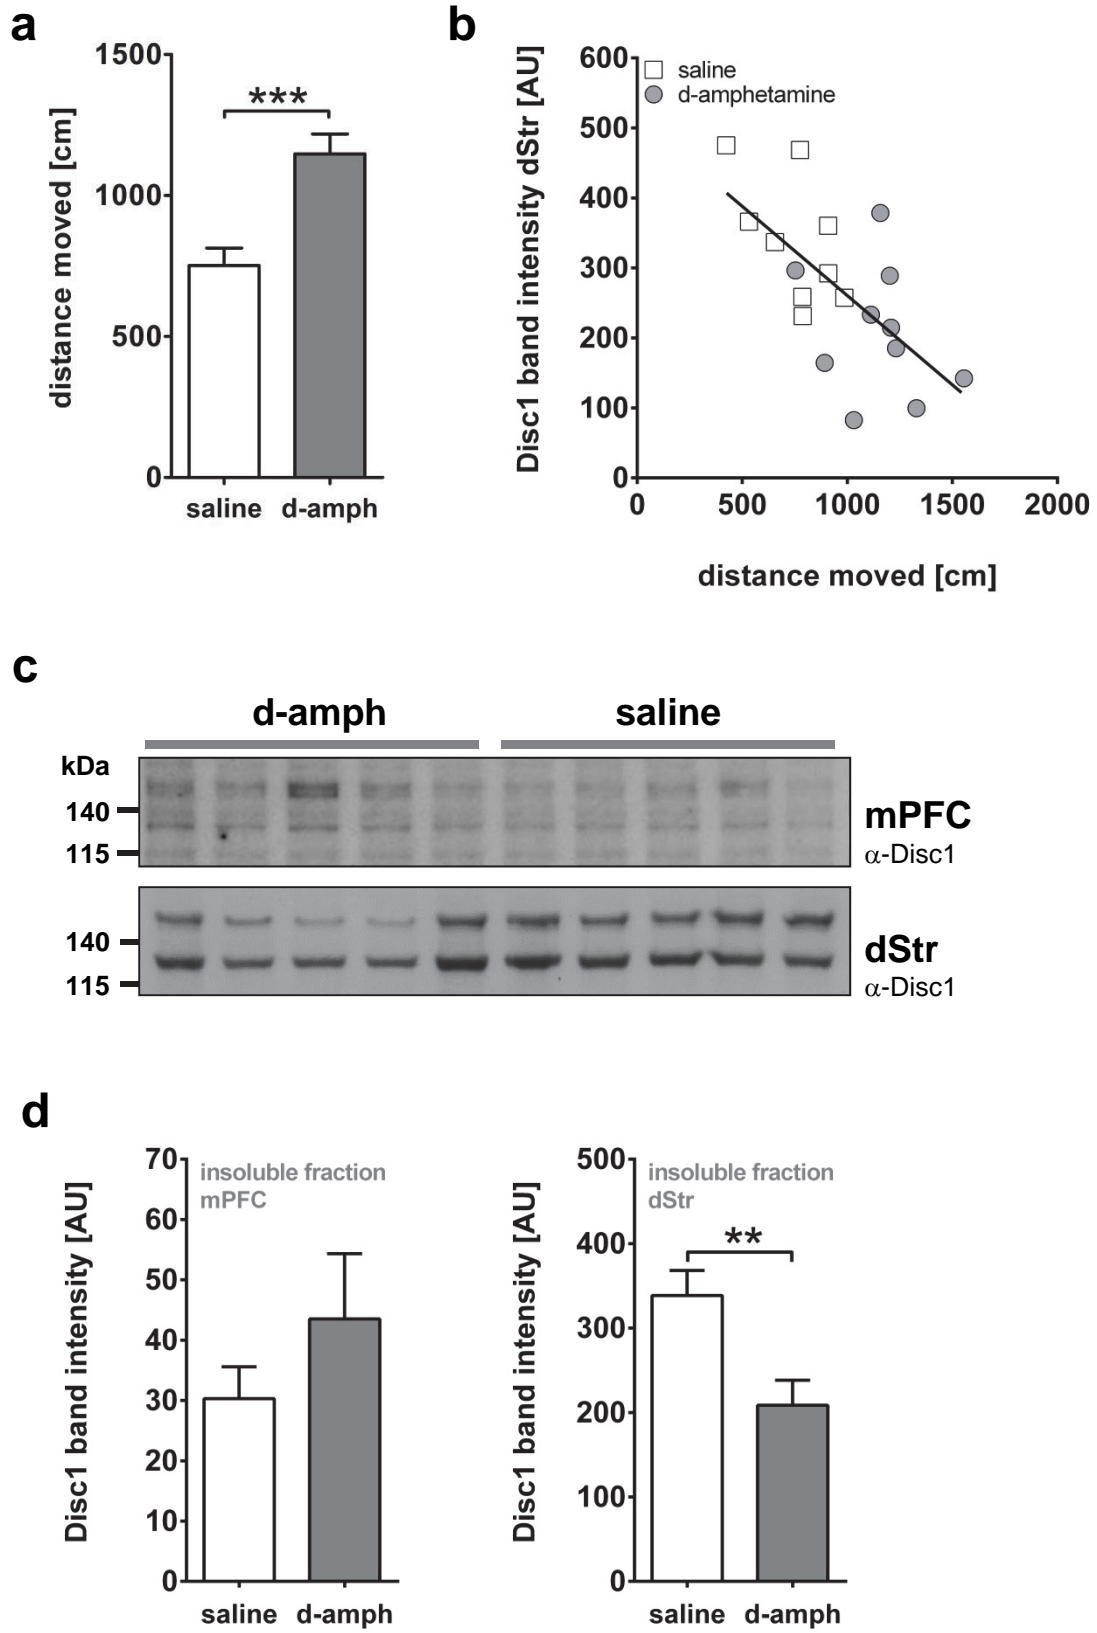

Supplement: mp2015194x2.pdf [file mp2015194x2.pdf]
